# Supplementary material
Source: publisher figshare collection journal article supplement (https://diabetesjournals.figshare.com/ndownloader/files/23743286)

## **Supplemental Figures**

### **A Small Molecule, UAB126, Reverses Diet-Induced Obesity and Its Associated Metabolic Disorders**

Guang Ren, Teayoun Kim, Hae-Suk Kim, Martin E. Young, Donald D. Muccio, Venkatram R. Atigadda, Samuel I. Blum, Hubert M. Tse, Kirk M. Habegger, Sushant Bhatnagar, Tatjana Coric, Mary-Ann Bjornsti, Anath Shalev, Stuart J. Frank, and Jeong-a Kim

**Supplementary Figure 1. UAB126 does not affect RER in LFD-fed mice, but increases oxygen consumption.** Indirect calorimetry was used to measure RER (A),  $\text{VO}_2$  (B), and  $\text{VCO}_2$  (C) in LFD-fed mice. UAB126 increases oxygen consumption, which suggests that metabolic rate is increased. (n=5-6).

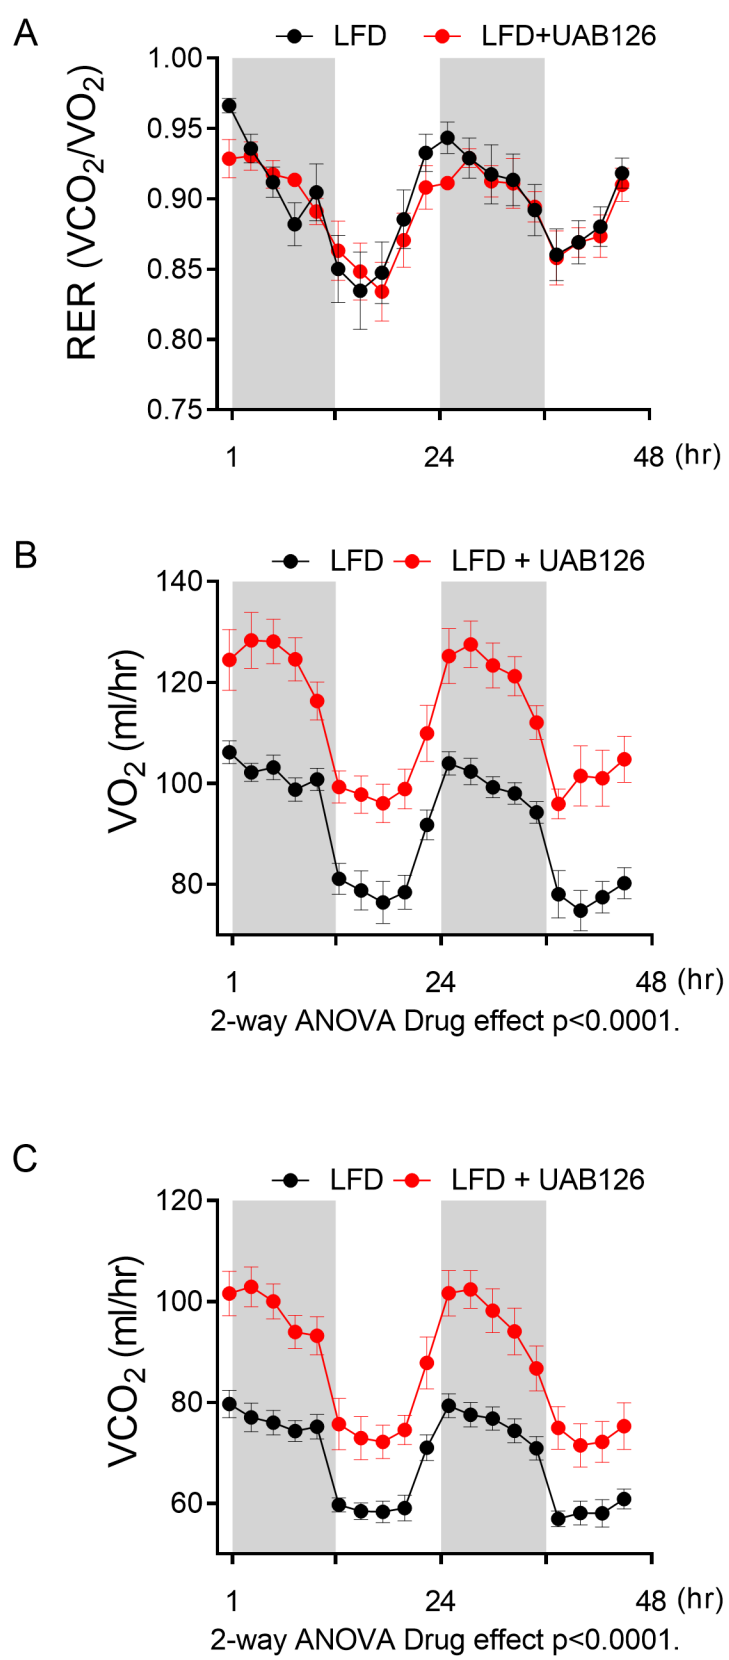

**Supplementary Figure 2. Flow cytometry gating strategy.** Stromal vascular cells were pre-gated on single cells, live cells, CD45<sup>+</sup>, and a CD4<sup>-</sup> and CD8<sup>-</sup> dump gate was used to immunophenotype myeloid cells (CD11b<sup>+</sup>) and macrophages (F4/80). Monocytes were identified as CD11b<sup>+</sup> CD68<sup>+</sup> and macrophages were CD11b<sup>+</sup> F4/80<sup>+</sup>. Pro-inflammatory monocytes were identified as CD11b<sup>+</sup> TNF $\alpha$ <sup>+</sup>, pro-inflammatory macrophages were identified as CD11b<sup>+</sup> F4/80<sup>+</sup> MHCII<sup>+</sup> and CD11b<sup>+</sup> F4/80<sup>+</sup> TNF $\alpha$ <sup>+</sup>. Fluorescence minus one (FMO) and isotype control is also shown for F4/80, MHCII, and TNF $\alpha$ .

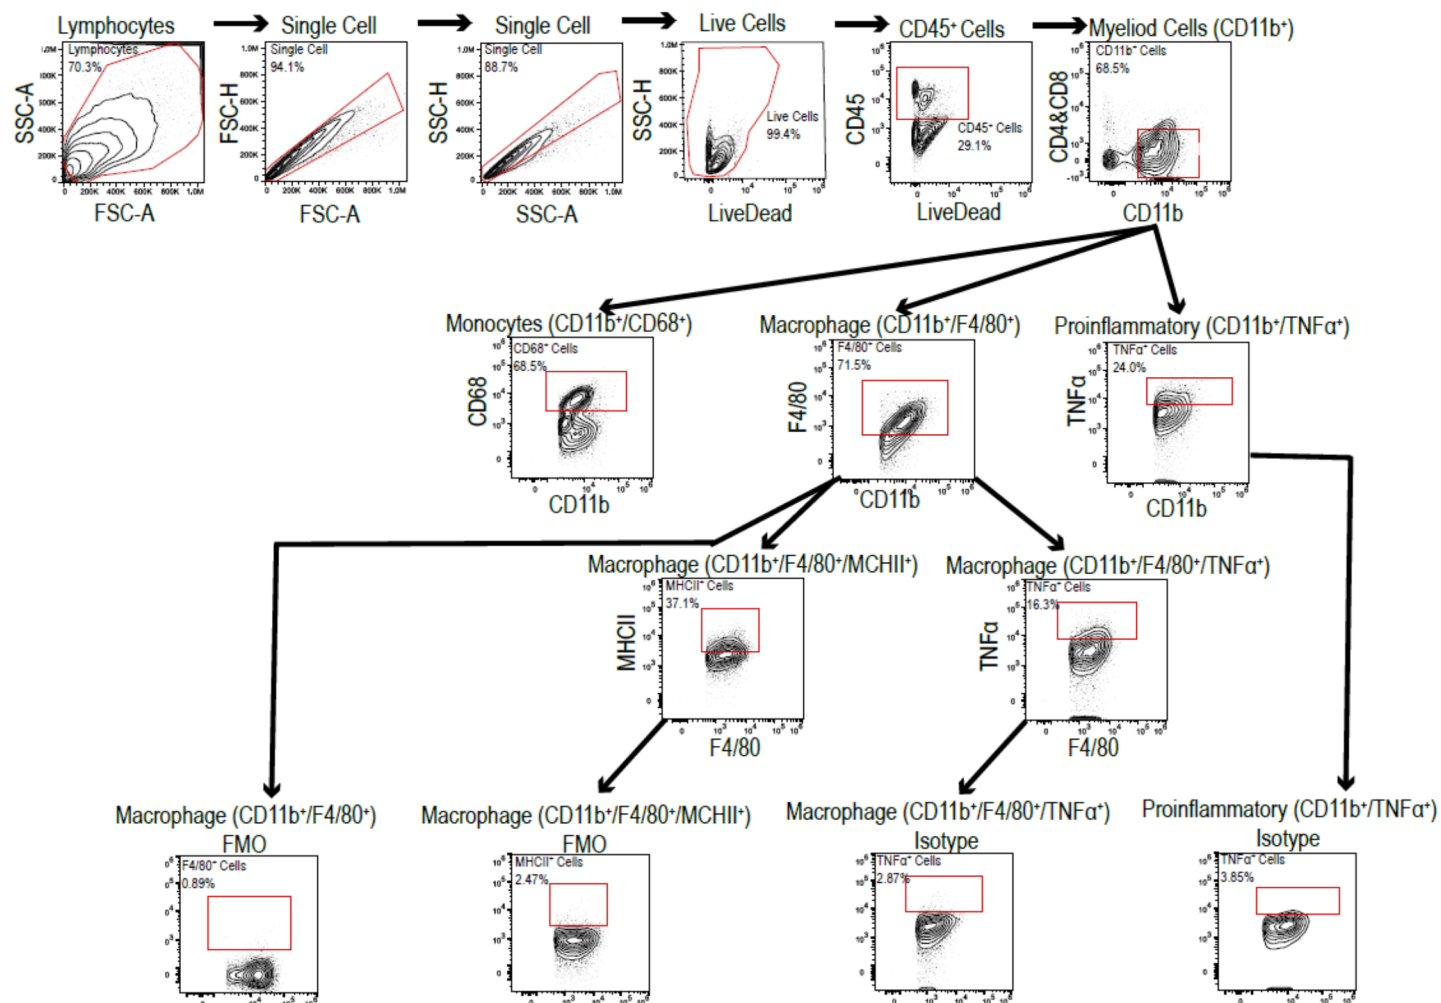

**Supplementary Figure 3. Representative FACS plots of myeloid cells, monocytes, and macrophages from SVC of mice on a high fat diet, low fat diet, and treated with or without UAB126.** Flow cytometry analysis of stromal vascular cells isolated from epididymal adipose tissue for the detection of CD11b<sup>+</sup> myeloid cells (A), CD11b<sup>+</sup> CD68<sup>+</sup> monocytes (B), CD11b<sup>+</sup> F4/80<sup>+</sup> macrophages (C), proinflammatory CD11b<sup>+</sup> TNF $\alpha$ <sup>+</sup> myeloid cells (D), activated CD11b<sup>+</sup> F4/80<sup>+</sup> MHCII<sup>+</sup> macrophages (E), and proinflammatory CD11b<sup>+</sup> F4/80<sup>+</sup> TNF $\alpha$ <sup>+</sup> M1 macrophages (F). (n=5-7)

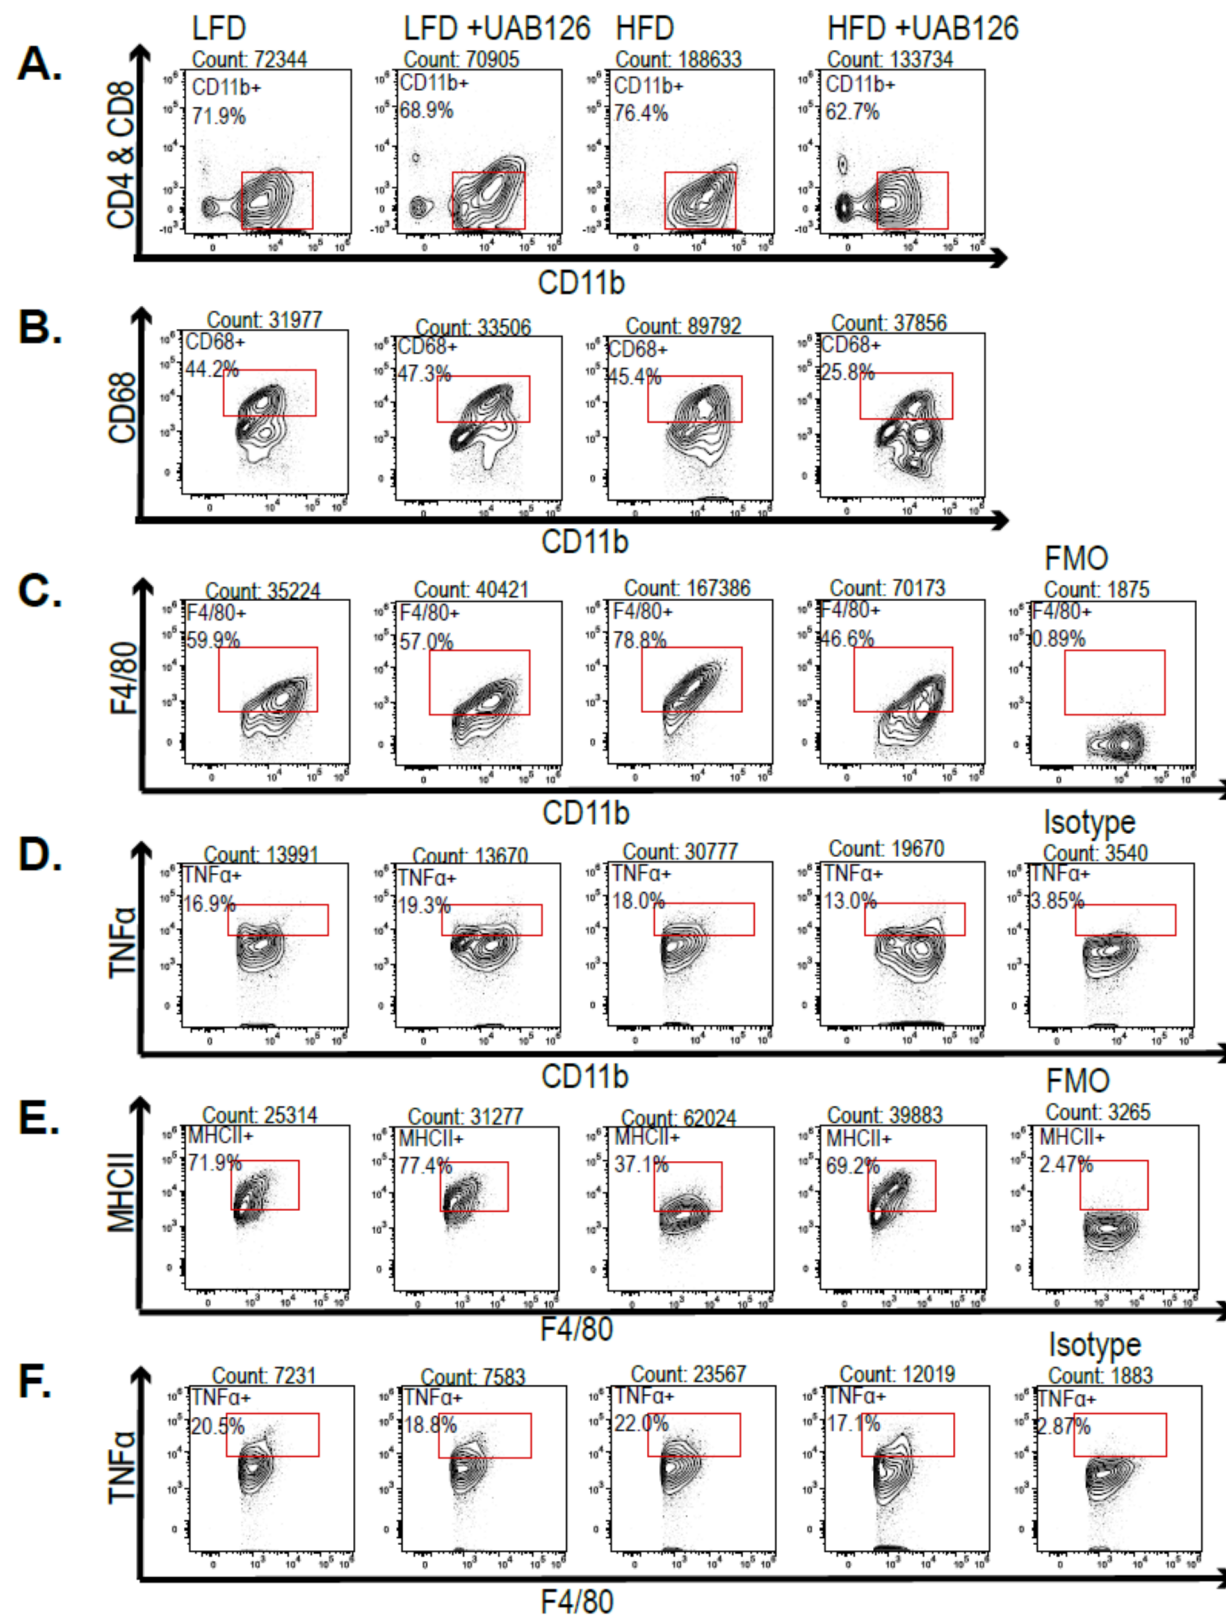

**Supplemental Fig. 4 UAB126 requires in vivo metabolism for its activity.** Human embryonic kidney 293 (HEK293) cells were transiently transfected with a luciferase construct containing RXR responsive element, a plasmid expressing RXR $\alpha$  and pRL-tk (Promega), and then treated with UAB30 (1  $\mu$ M), or UAB126 (10  $\mu$ M) for overnight prior to a dual luciferase assays **(A)**. Stromal vascular cells (SVC) were isolated from inguinal fat tissue of C57BL/6J mice, and then the SVCs were incubated with brown adipocyte differentiation media with or without UAB126 or UAB30, and uncoupling protein (Ucp-1) gene expression was assessed by qPCR **(B)**. Serum from vehicle-treated mice was spiked with UAB126 and run as a positive control in the HPLC analysis **(C)**. UAB126 was dissolved in 1:9 (Ethanol: PEG400), and then UAB126 (100 mg/kg body weight/day) was orally administered by gavage for 5 days. One hour after the final dose, serum was collected and subjected to HPLC analysis **(D)**.

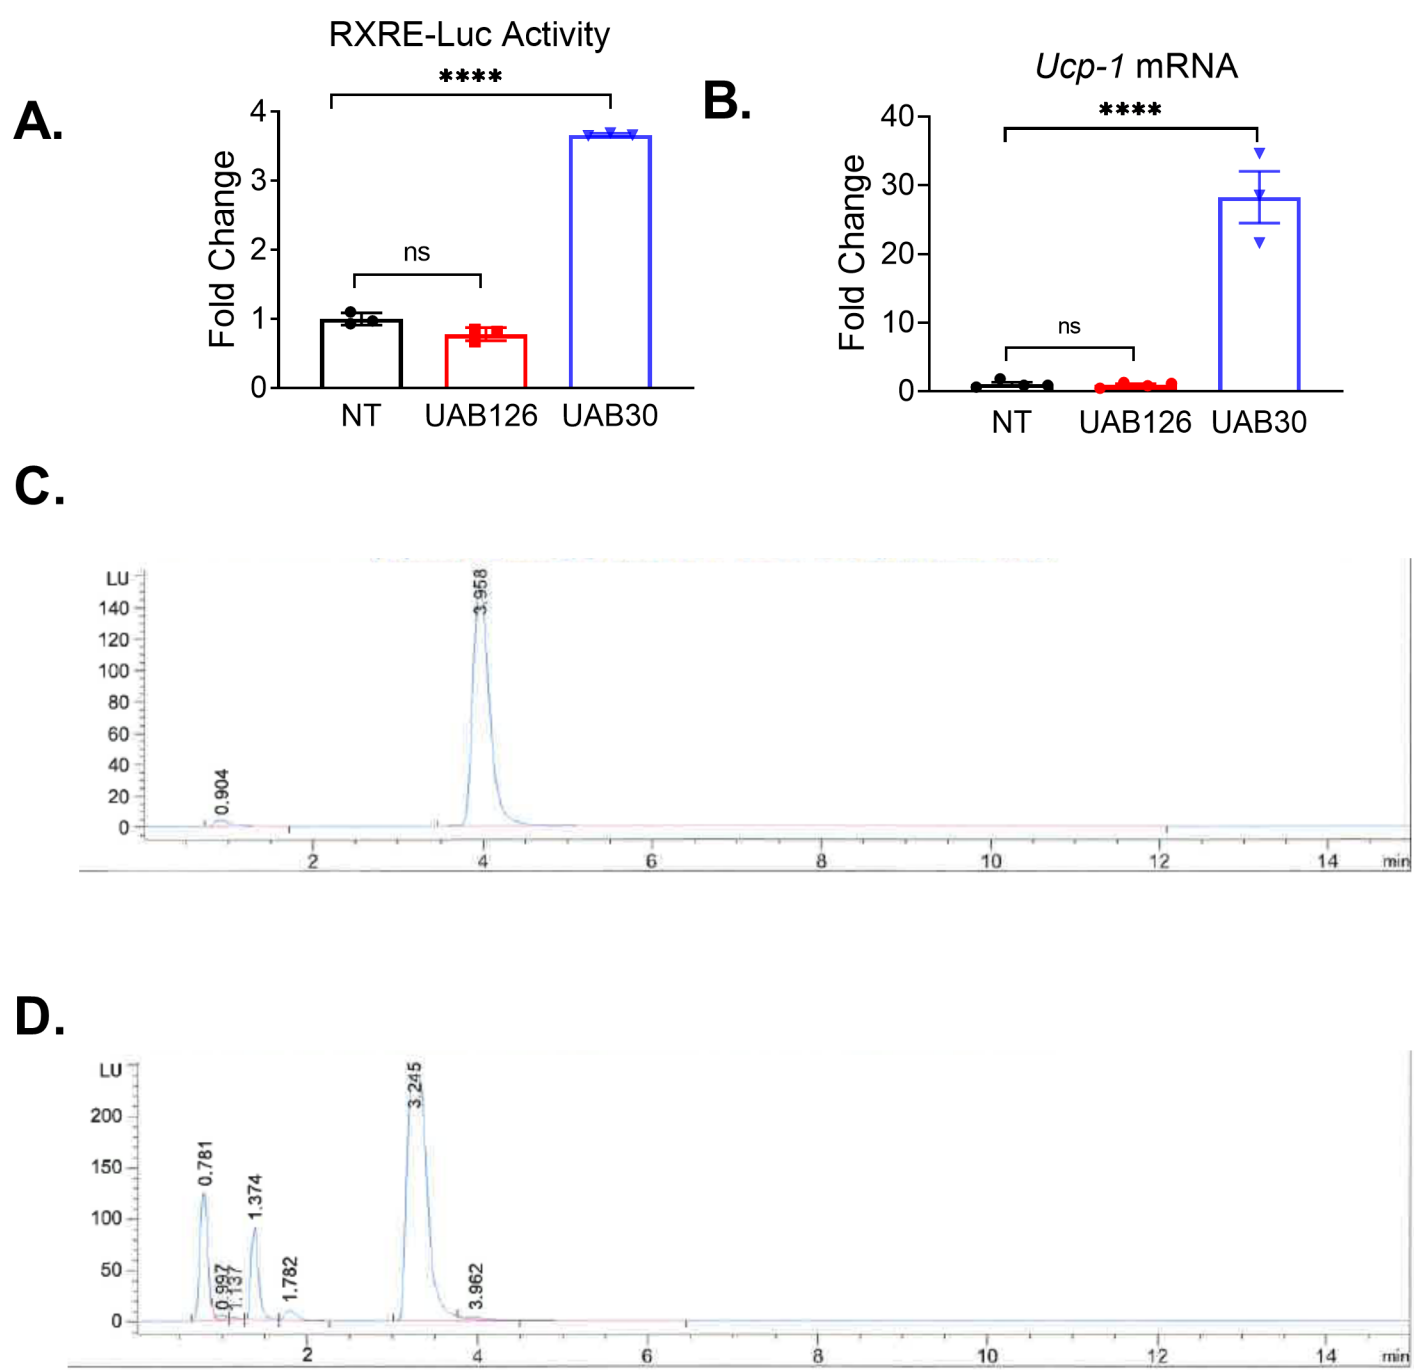

Supplement: Supplementary file 1 [file 23743286]
